# Supplementary material for: A stable pillared-layer Cu(ii) metal–organic framework with magnetic properties for dye adsorption and separation
Source: Royal Society of Chemistry journal article supplement (doi:10.1039/c7nj00389g), 2017-01-01
Supplement: c7nj00389g1.pdf [file c7nj00389g1.pdf]

## Electronic Supplementary Information (ESI)

# **A stable pillared-layer Cu(II) metal–organic framework for dye adsorption and separation and magnetic properties**

Liu Yang, Xiao Li, Chun-Yi Sun,\* Han Wu, Chun-Gang Wang\* and Zhong-Min Su\*

Institute of Functional Material Chemistry, Local United Engineering Lab for Power  
Battery, Department of Chemistry, Northeast Normal University, Changchun, 130024  
Jilin, People's Republic of China.

\*E-mail: [suncy009@nenu.edu.cn](mailto:suncy009@nenu.edu.cn); [wangcg925@nenu.edu.cn](mailto:wangcg925@nenu.edu.cn); [zmsu@nenu.edu.cn](mailto:zmsu@nenu.edu.cn)

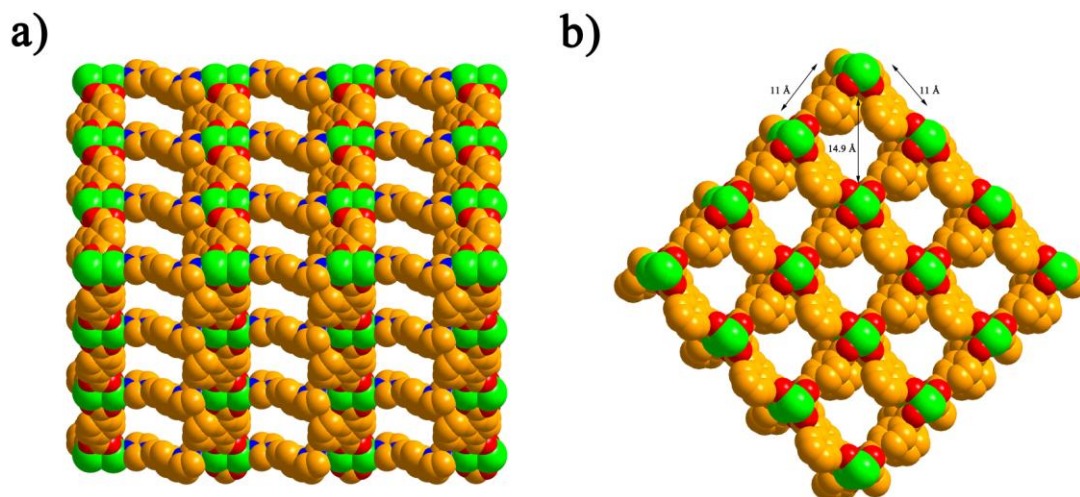

**Fig. S1** The space-filling structure of **1** along *a* axis a) and *c* axis b). All hydrogen atoms are omitted for clarity. The green, red and blue represent copper, oxygen and nitrogen atoms, respectively.

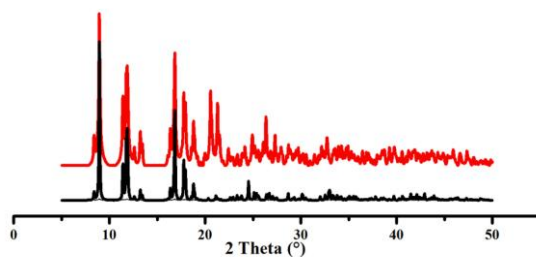

**Fig. S2** PXRD powder diffraction patterns of **1**: simulated (black), as-synthesized (red).

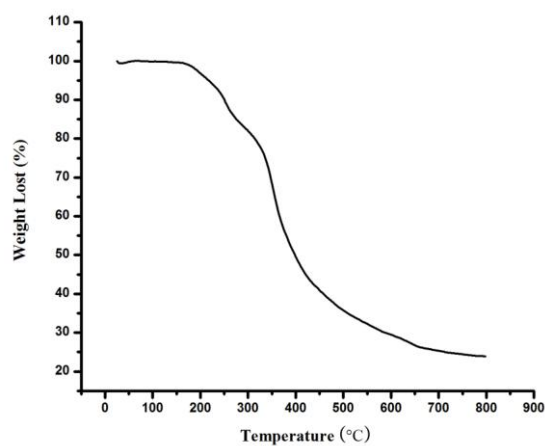

**Fig. S3** The TG curve of **1**.

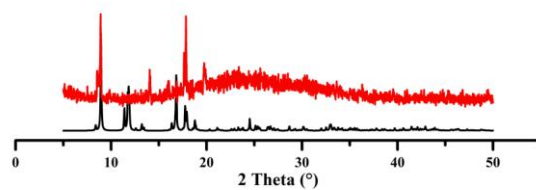

**Fig. S4** PXRD powder diffraction patterns of **1**: simulated (black), at 220 °C (red).

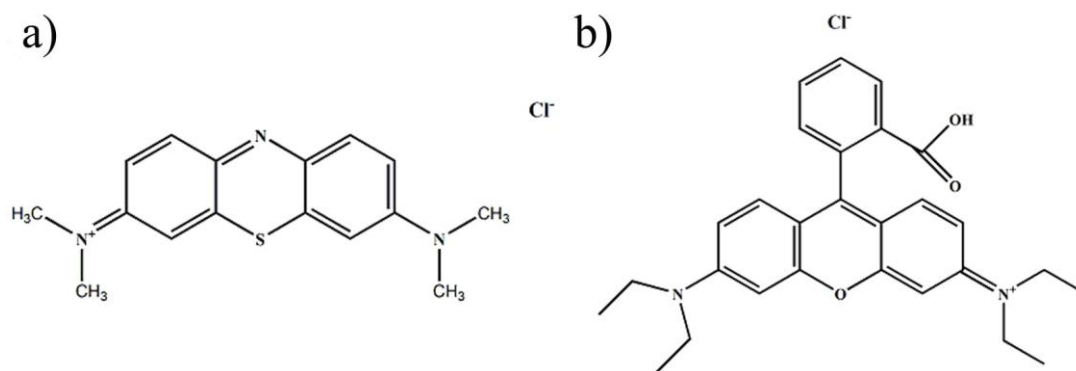

**Fig. S5** The structures of MB (a) and RB.

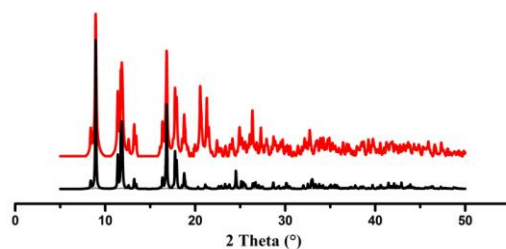

**Fig. S6** PXRD powder diffraction patterns of **1**: simulated (black), after dye adsorption and releasing (red).



**Table S1** Selected Bonds Lengths (Å) and Angles (°) for **1**

---

| Compound <b>1</b> |           |                   |           |
|-------------------|-----------|-------------------|-----------|
| N(1)-Cu(1)#5      | 2.032(14) | N(4)-Cu(2)        | 2.129(13) |
| O(1)-Cu(2)        | 1.956(11) | O(2)-Cu(1)        | 2.021(11) |
| O(3)-Cu(2)        | 2.058(11) | O(4)-Cu(1)        | 1.955(11) |
| O(5)-Cu(2)        | 2.024(10) | O(6)-Cu(1)        | 1.965(11) |
| O(7)-Cu(2)        | 1.912(10) | O(8)-Cu(1)        | 2.077(10) |
| Cu(1)-N(1)#6      | 2.046(13) | O(4)-Cu(1)-O(6)   | 171.7(5)  |
| O(4)-Cu(1)-O(2)   | 86.4(4)   | O(6)-Cu(1)-O(2)   | 88.7(5)   |
| O(4)-Cu(1)-N(1)#6 | 92.9(5)   | O(6)-Cu(1)-N(1)#6 | 95.2(5)   |
| O(2)-Cu(1)-N(1)#6 | 112.0(5)  | O(4)-Cu(1)-O(8)   | 88.2(5)   |
| O(6)-Cu(1)-O(8)   | 93.2(4)   | O(2)-Cu(1)-O(8)   | 153.3(4)  |
| N(1)#6-Cu(1)-O(8) | 94.4(5)   | O(7)-Cu(2)-O(1)   | 174.9(5)  |
| O(7)-Cu(2)-O(5)   | 89.2(4)   | O(1)-Cu(2)-O(5)   | 87.2(5)   |
| O(7)-Cu(2)-O(3)   | 91.9(5)   | O(1)-Cu(2)-O(3)   | 89.9(4)   |
| O(5)-Cu(2)-O(3)   | 155.8(4)  | O(7)-Cu(2)-N(4)   | 95.9(5)   |
| O(1)-Cu(2)-N(4)   | 88.5(5)   | O(5)-Cu(2)-N(4)   | 105.6(5)  |
| O(3)-Cu(2)-N(4)   | 98.4(5)   |                   |           |

---

Symmetry transformations used to generate equivalent atoms: #5 = x, y, z+1; #6 = x, y, z-1.
